# Supplementary material for: Cell-to-Cell Variation in Defective Virus Expression and Effects on Host Responses during Influenza Virus Infection
Source: PubMed Central journal article supplement (PMC6960286; doi:10.1128/mbio.02880-19), 2020-01-14

Fig. S6

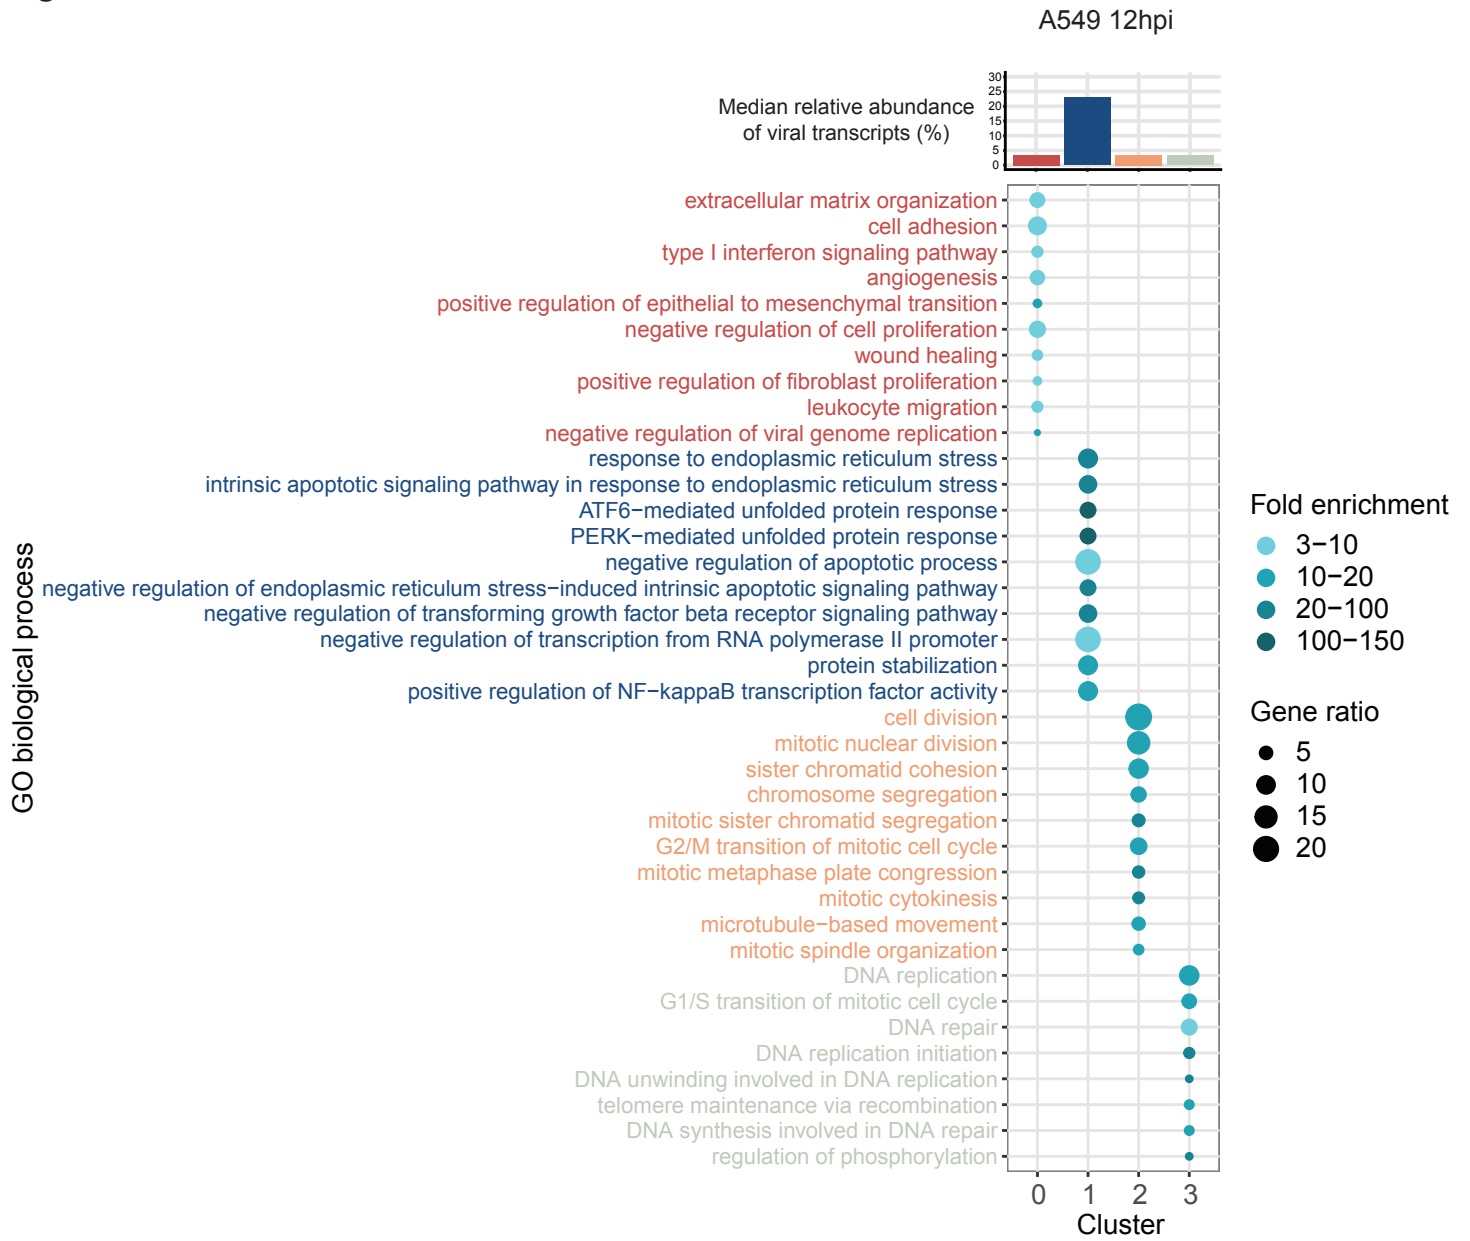

Supplement: mBio.02880-19-sf006.pdf [file mBio.02880-19-sf006.pdf]
